# Supplementary material
Source: PubMed Central journal article supplement (PMC5705568)
Supplement: NIHMS903514-supplement-Supp_Info.pdf [file NIHMS903514-supplement-Supp_Info.pdf]

# GSK-3 $\beta$ Inhibition Suppresses Instability-induced Osteolysis by a Dual Action on Osteoblast and Osteoclast Differentiation

Mehdi Amirhosseini, Rune Vinther Madsen, K. Jane Escott, Mathias Bostrom, Patrick F.

Ross, Anna Fahlgren

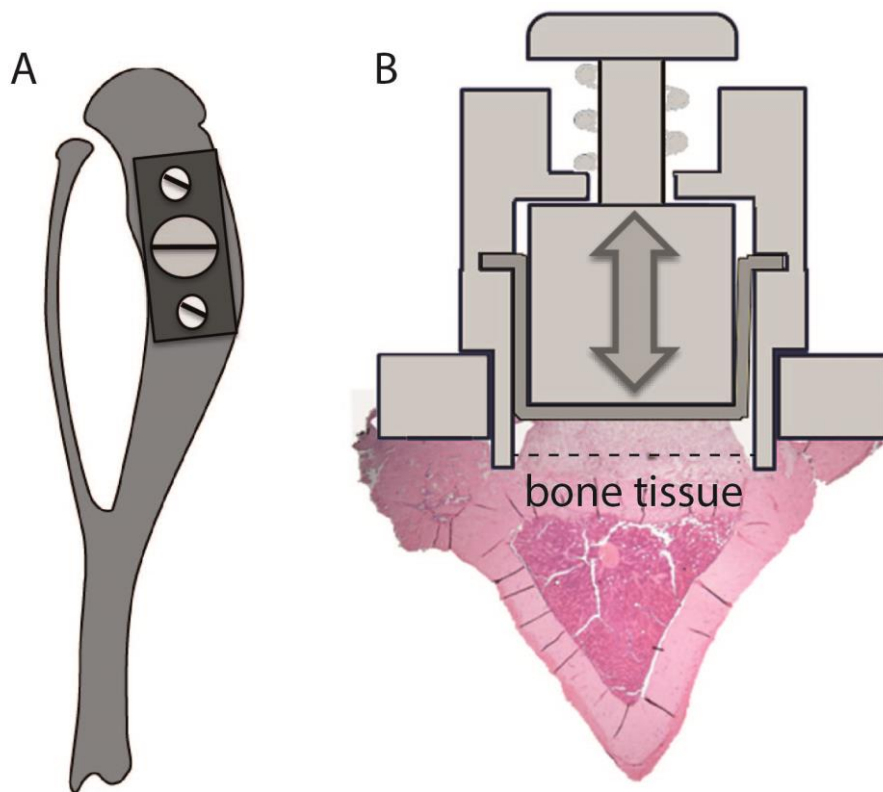

**Figure S1.** Schematic drawing of the rat model for mechanical instability-induced prosthetic loosening. **A)** Illustration of the location of the inserted titanium implant on a proximal tibia with the central screw and **B)** a transverse section of proximal tibia after the central screw is replaced with a pressure piston. When loading, the lowest position of the piston is 0.6 mm from the bone surface (the dotted line) and the upper position is 1.4 mm from the bone surface. When the piston is moving, it creates pressure onto the underlying bone. The loading frequency is 0.17 Hz, which is applied for 2 minutes twice daily.
